# Supplementary material
Source: MDPI journal article supplement (https://www.mdpi.com/2073-4344/10/8/904)
Supplement: s1 [file s1]

## Supporting Information of:

# NHC Ligand Effects on Ru-catalyzed Cross-Metathesis of Renewable Materials

Veronica Paradiso, Raffaele Contino and Fabia Grisi \*

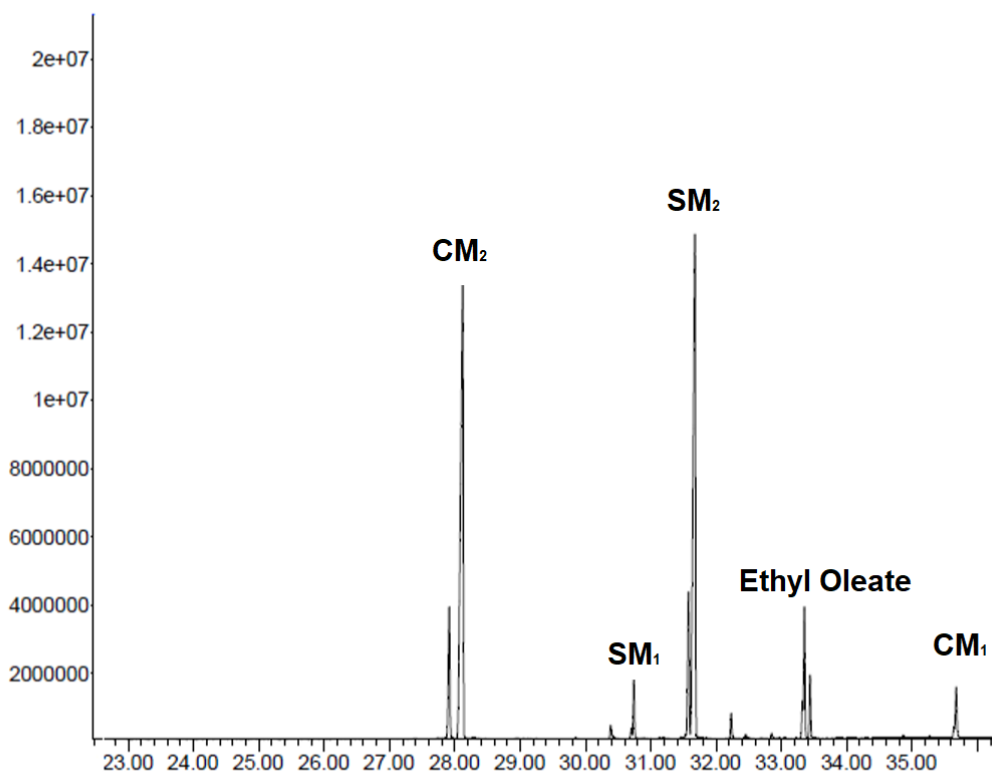

**Figure S1:** Representative chromatogram of the crude reaction mixture from the CM of **1** and **2**.

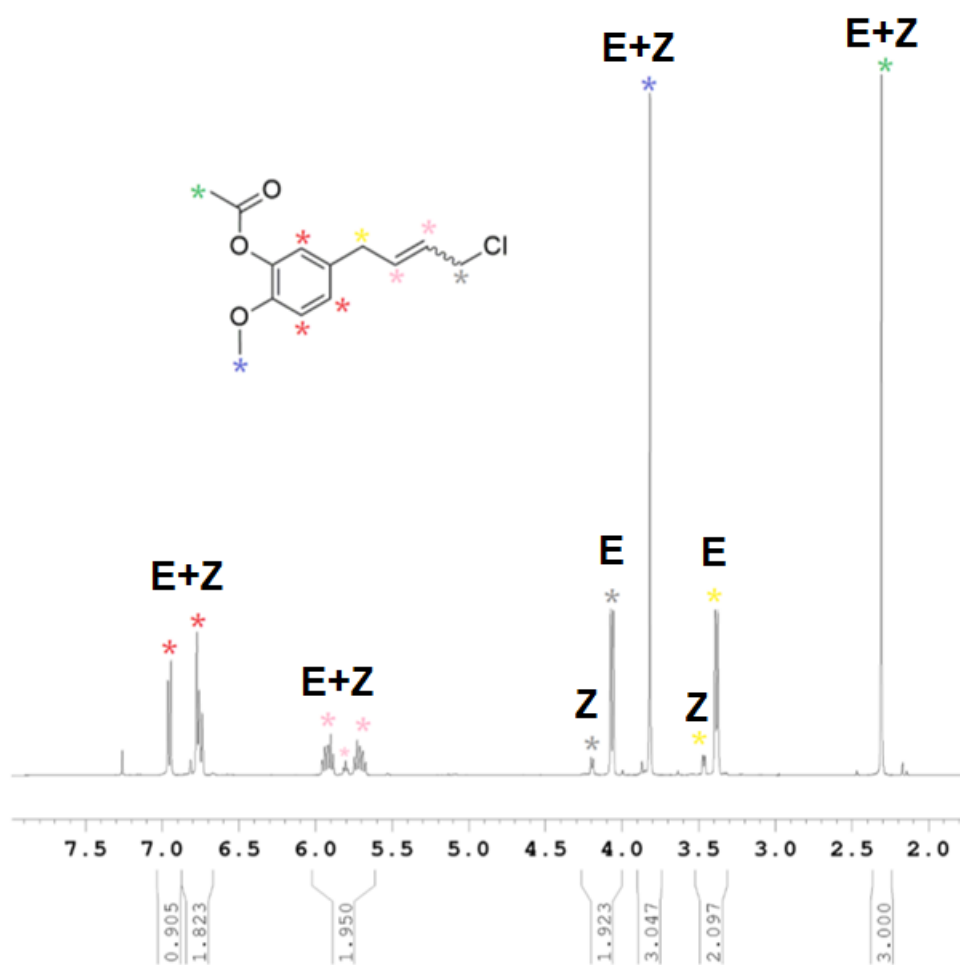

**Figure S2:** Representative <sup>1</sup>H NMR spectrum of the CM product from reaction of 3 and 4 (CDCl<sub>3</sub>, 400 MHz).
